# Supplementary material
Source: ML conference proceedings conference paper supplement (https://proceedings.neurips.cc/paper_files/paper/2023/hash/0fb7c02d420c993385c7de44c2b5bf01-Abstract.html)
Supplement: Supplementary file 1 [file 0fb7c02d420c993385c7de44c2b5bf01-Supplemental-Conference.zip]

Archive with 4 entries (4 files):
- de_novo_NLS_sequences.csv
- __MACOSX/._de_novo_NLS_sequences.csv
- Supplementary Material.pdf
- __MACOSX/._Supplementary Material.pdf
